# Supplementary material for: A Cross-Sectional Study of Colonization Rates with Methicillin-Resistant Staphylococcus aureus (MRSA) and Extended-Spectrum Beta-Lactamase (ESBL) and Carbapenemase-Producing Enterobacteriaceae in Four Swiss Refugee Centres
Source: PubMed Central journal article supplement (PMC5234815; doi:10.1371/journal.pone.0170251), 2017-01-13
Supplement: pone.0170251.s002.pdf [file pone.0170251.s002.pdf]

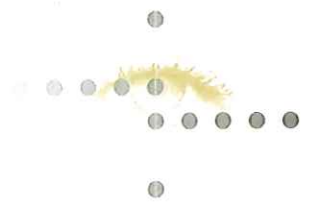

Präsident  
Prof. André P. Perruchoud  
Vizepräsidenten  
Prof. Gregor Schubiger  
Dr. Marco Schärer

Herr  
Dr. med. Rein Jan Piso  
Kantonsspital Olten  
Baslerstrasse 150  
4600 Olten

Basel, 01. Februar 2016 / NJ

**EKNZ 2016-00005:  
Prevalence of MRSA and ESBL in Four Swiss Refugee Centres**

Sehr geehrter Herr Dr. Piso

Besten Dank für Ihre Einreichung datiert vom 5. Januar 2016 samt Beilagen. Die Ethikkommission Nordwest- und Zentralschweiz hat die Dokumente zum oben genannten Projekt zur Kenntnis genommen und nimmt nun wie folgt Stellung:

Unsere Abklärungen haben ergeben, dass es sich um keine bewilligungspflichtige Studie im Sinne der kantonalen und eidgenössischen Gesetzgebung handelt, weil es eine Qualitätskontrolle betrifft. Aus diesem Grund kann die EKNZ keine förmliche Bewilligung ausstellen. Nach Überprüfung der Anfrage kann die EKNZ jedoch feststellen, dass die Durchführung dieser Studie aus ethischer Sicht unbedenklich ist (vgl. Art. 51 Abs. 2 Humanforschungsgesetz).

Ich hoffe, Ihnen mit diesen Angaben zu dienen und verbleibe

mit freundlichen Grüssen

Prof. A. P. Perruchoud  
Präsident der Ethikkommission  
Nordwest- und Zentralschweiz / EKNZ
